# Supplementary material
Source: Springer Nature journal article supplement (https://www.springermedizin.de/resource/supplementary/12881_2007_303_MOESM1_ESM.pdf/9453058)
Supplement: MOESM1 [file 9453058]

**Supplement Table 1 - Results of haplotype analysis in interaction effect models including three-way interaction terms between sex, TC/HDL-C and the genetic variants (n=1,968).**

|                                    | $\beta$ | HR    | [95% CI]       | <i>p</i> -value      |
|------------------------------------|---------|-------|----------------|----------------------|
| H2*                                | -1.41   | 0.24  | [0.04; 1.51]   | 0.13                 |
| H3*                                | -1.08   | 0.34  | [0.06; 1.80]   | 0.20                 |
| H4*                                | -3.74   | 0.02  | [0.00; 0.43]   | 0.01                 |
| H5*                                | -4.59   | 0.01  | [0.00; 0.22]   | $3.5 \times 10^{-3}$ |
| H6*                                | 0.18    | 1.20  | [0.02; 73.94]  | 0.93                 |
| H7*                                | -5.80   | 0.00  | [0.00; 0.91]   | 0.05                 |
| Sex*                               | -2.42   | 0.09  | [0.03; 0.31]   | $1.6 \times 10^{-4}$ |
| TC/HDL-C                           | -0.48   | 0.62  | [0.45; 0.84]   | $2.3 \times 10^{-3}$ |
| TC/HDL-C $\times$ Sex*             | 0.49    | 1.63  | [1.29; 2.06]   | $3.7 \times 10^{-5}$ |
| Sex $\times$ H2*                   | 1.04    | 2.83  | [0.79; 10.12]  | 0.11                 |
| Sex $\times$ H3*                   | 1.10    | 3.01  | [0.85; 10.69]  | 0.09                 |
| Sex $\times$ H4*                   | 2.42    | 11.21 | [1.73; 72.56]  | 0.01                 |
| Sex $\times$ H5*                   | 2.27    | 9.69  | [1.40; 67.11]  | 0.02                 |
| Sex $\times$ H6*                   | -1.03   | 0.36  | [0.01; 9.96]   | 0.54                 |
| Sex $\times$ H7*                   | 2.46    | 11.69 | [0.24; 563.09] | 0.21                 |
| TC/HDL-C $\times$ H2*              | 0.37    | 1.45  | [1.04; 2.01]   | 0.03                 |
| TC/HDL-C $\times$ H3*              | 0.31    | 1.36  | [1.00; 1.84]   | 0.05                 |
| TC/HDL-C $\times$ H4*              | 0.85    | 2.34  | [1.41; 3.88]   | $1.0 \times 10^{-3}$ |
| TC/HDL-C $\times$ H5*              | 0.83    | 2.30  | [1.38; 3.83]   | $1.3 \times 10^{-3}$ |
| TC/HDL-C $\times$ H6*              | 0.03    | 1.03  | [0.52; 2.04]   | 0.93                 |
| TC/HDL-C $\times$ H7*              | 0.93    | 2.55  | [1.18; 5.48]   | 0.02                 |
| Sex $\times$ TC/HDL-C $\times$ H2* | -0.27   | 0.76  | [0.59; 0.97]   | 0.03                 |
| Sex $\times$ TC/HDL-C $\times$ H3* | -0.30   | 0.74  | [0.57; 0.97]   | 0.03                 |
| Sex $\times$ TC/HDL-C $\times$ H4* | -0.59   | 0.55  | [0.39; 0.78]   | $8.9 \times 10^{-4}$ |
| Sex $\times$ TC/HDL-C $\times$ H5* | -0.40   | 0.67  | [0.47; 0.96]   | 0.03                 |
| Sex $\times$ TC/HDL-C $\times$ H6* | 0.11    | 1.12  | [0.62; 2.03]   | 0.71                 |
| Sex $\times$ TC/HDL-C $\times$ H7* | -0.40   | 0.67  | [0.37; 1.24]   | 0.20                 |

\* H1 and male sex are used as the reference

**Supplement Figure 1 - Hazard ratios of incident type 2 diabetes related to the respective TC/HDL-C concentration in men estimated by interaction effect models including two- and three-way interaction terms between sex, TC/HDL-C and the genetic variants.**

Dashed lines represent subjects who are homozygote for the minor allele, while continuous lines show heterozygotes for SNP 1-4 and heterozygotes or homozygotes for the minor allele for SNP 5-7. Small bars at the x-axis indicate TC/HDL-C concentrations of patients with at least one copy of the minor allele.

**Supplement Figure 2 - Hazard ratios of incident type 2 diabetes related to the respective TC/HDL-C concentration in men estimated by interaction effect models including two- and three-way interaction terms between sex, TC/HDL-C and the genetic variants.**

Dashed lines represent subjects who are homozygote for the minor allele, while continuous lines show heterozygotes for SNP 1-4 and heterozygotes or homozygotes for the minor allele for SNP 5-7. Small bars at the x-axis indicate TC/HDL-C concentrations of patients with at least one copy of the minor allele.

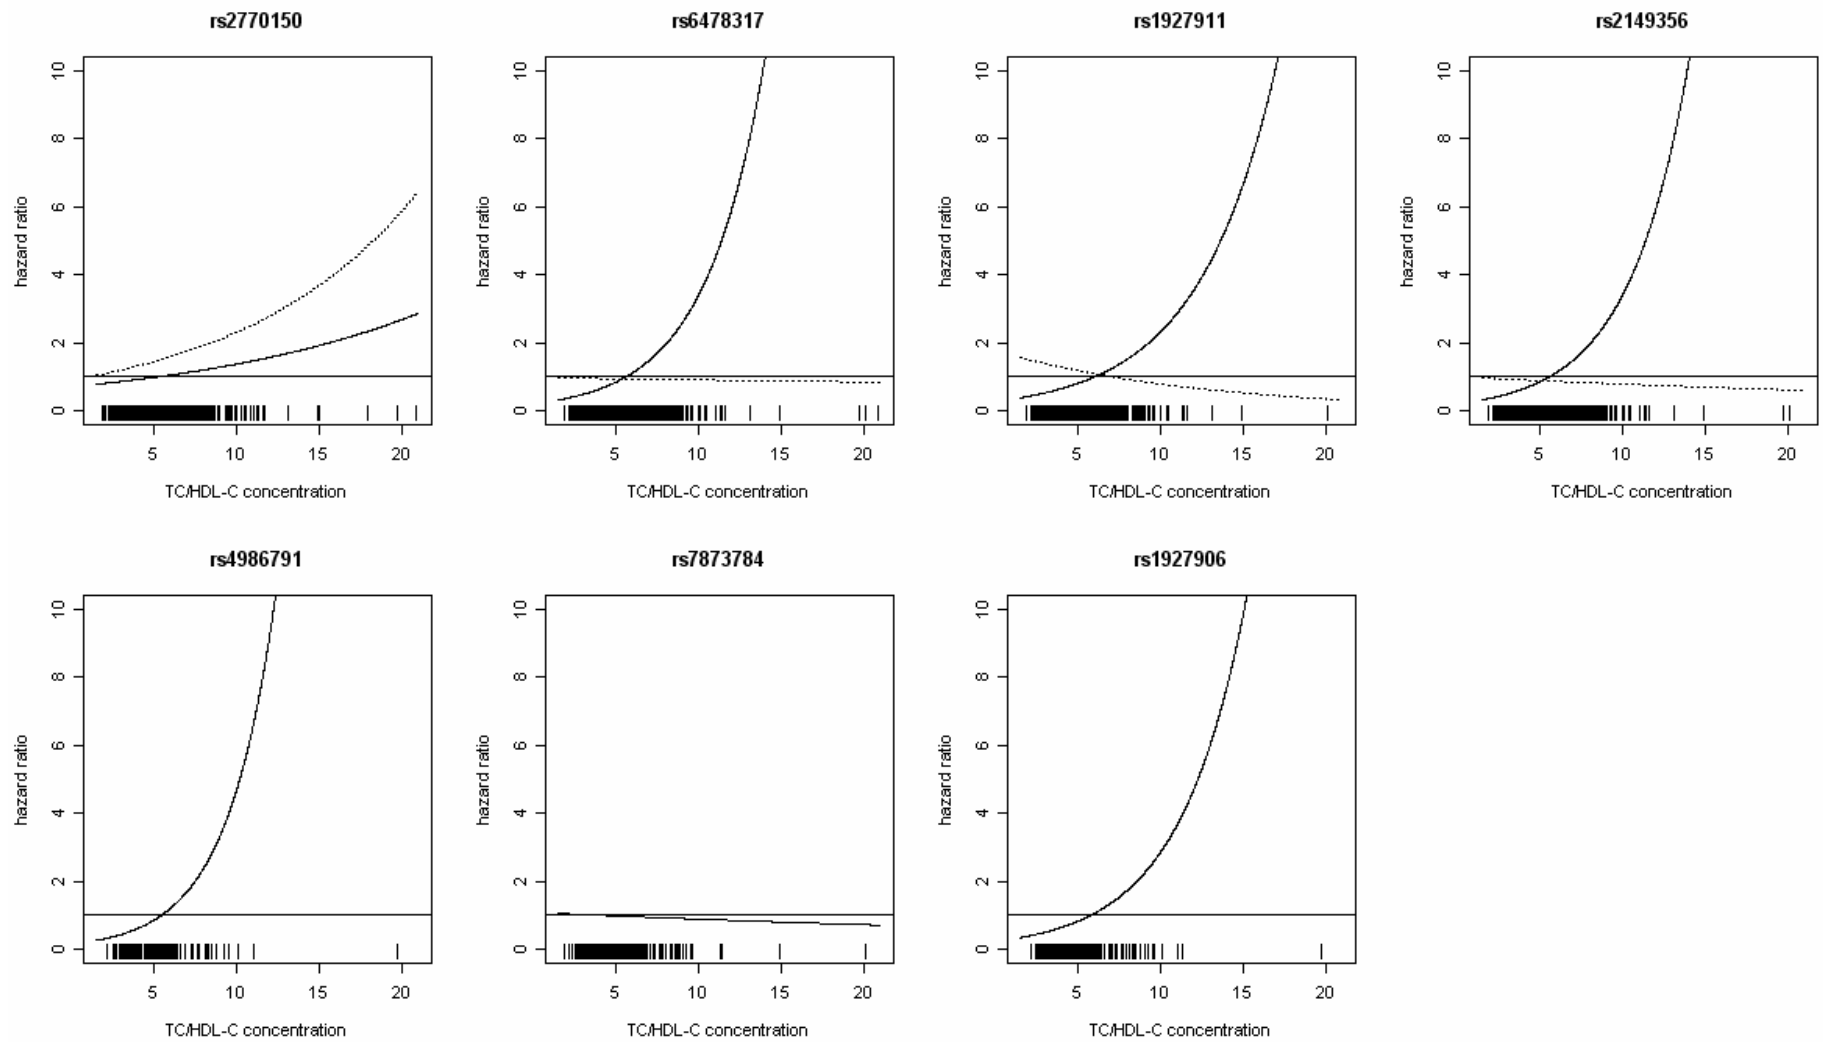

**Supplement Figure 1**

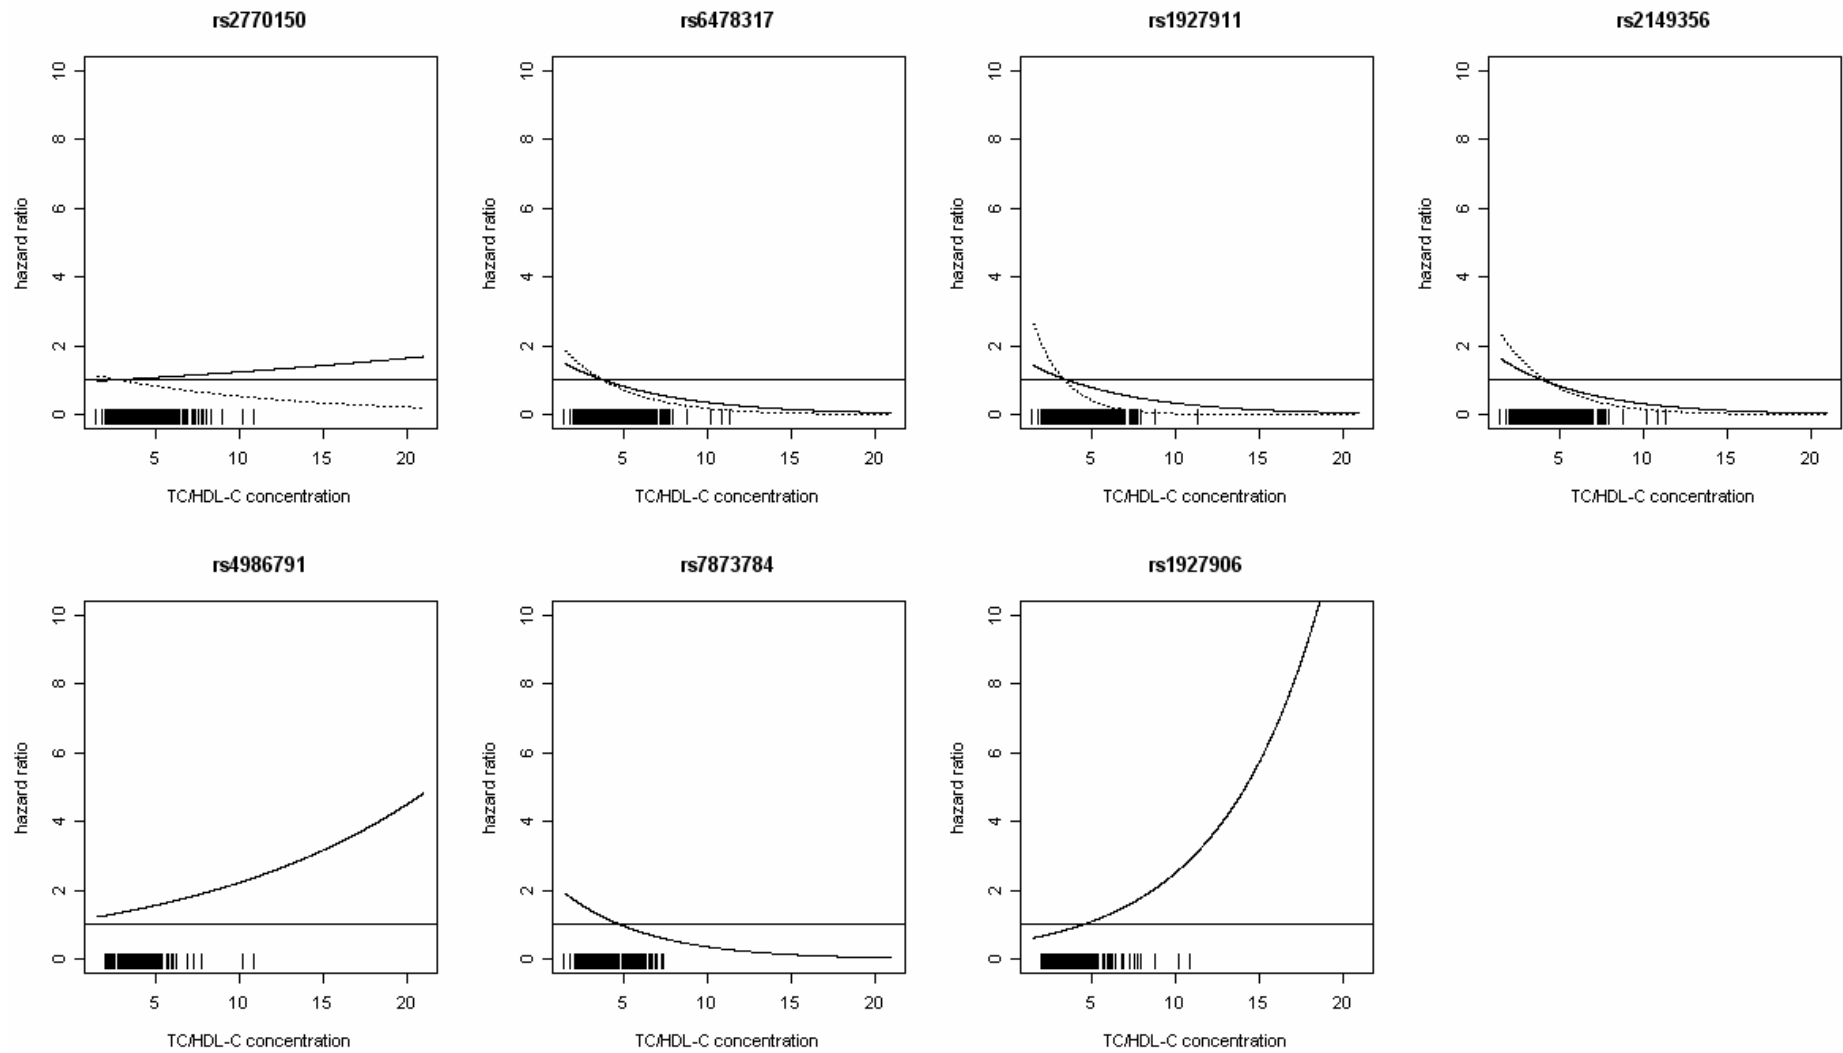

**Supplement Figure 2**
